# Supplementary material for: Heritable and Precise Zebrafish Genome Editing Using a CRISPR-Cas System
Source: PLOS journal article supplement (doi:10.1371/journal.pone.0068708), 2013-07-09
Supplement: S2 (10.1371/journal.pone.0068708.s002) [file journal.pone.0068708.s002]

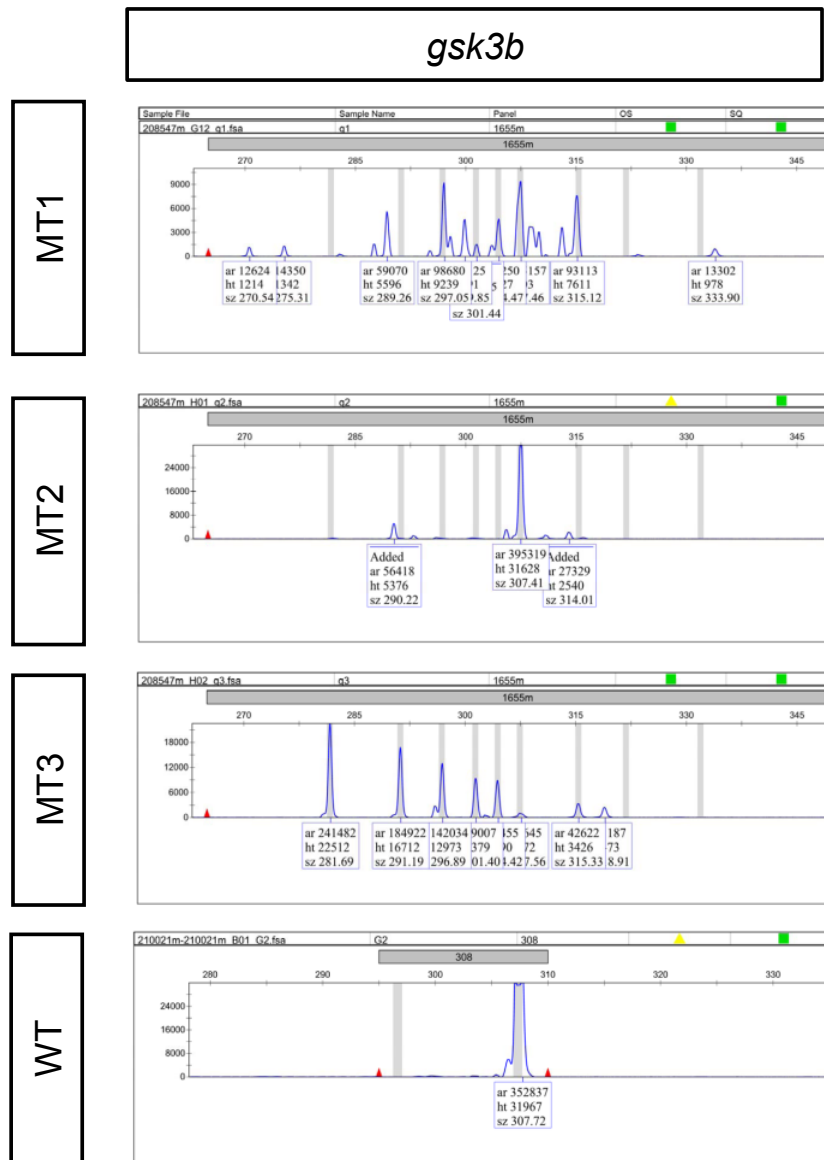

**Figure S2.** One *gsk3b* founder fish showed an almost complete loss of the wild-type allele in its fins. Genomic DNAs isolated from the fin biopsies of three *gsk3b* founder fish (MT1, MT2 and MT3) and a wild-type fish (WT) were used for PCR amplification of the *gsk3b* target locus. Fluorescent 6-FAM-labelled PCR products were analyzed using a DNA analyzer for size determination. While the wild-type genomic DNA show only one PCR product of 307 bps, the PCR products in the founders are of various sizes indicating indel mutations in these founder fish.
