# Supplementary material for: Heritable and Precise Zebrafish Genome Editing Using a CRISPR-Cas System
Source: PLOS journal article supplement (doi:10.1371/journal.pone.0068708), 2013-07-09
Supplement: S4 (10.1371/journal.pone.0068708.s004) [file journal.pone.0068708.s004]

**Table S1.** Mutation frequencies in the embryos co-injected with ssODN and the sgRNA:Cas9 system. Indel mutation frequencies shown here were assessed by colony sequencing as described in the Materials and Methods. n, the numbers of colonies sequenced.

| sgRNA/Cas9 target gene | ssODN        |              |
|------------------------|--------------|--------------|
|                        | EcoRI.S      | EcoRI.AS     |
| <i>fh</i>              | 81% (n=21)   | 28.5% (n=21) |
| <i>gsk3b</i>           | 28.1% (n=32) | 70.4% (n=27) |
